# Supplementary material for: Two DNA Methyltransferases for Site-Specific 6mA and 5mC DNA Modification in Xanthomonas euvesicatoria
Source: Front Plant Sci. 2021 Mar 24;12:621466. doi: 10.3389/fpls.2021.621466 (PMC8025778; doi:10.3389/fpls.2021.621466)
Supplement: Supplementary file 7 [file Table_7.XLSX]

## Sheet: Supplementary Table 7
Supplementary Table 7. Proteins negatively affected by overexpression of XvDMT1 or XvDMT2.
	COG group	Accession	gene function
XvDMT1 and XvDMT2	D	AOY66356	sodium:proton antiporter
	F	AOY66882	guanylate kinase
		AOY68004	nucleoside hydrolase
	G	AOY66560	phosphocarrier protein HPr
		AOY66748	alpha,alpha-trehalose-phosphate synthase (UDP-forming)
	H	AOY69044	molybdopterin biosynthesis protein MoeB
	K	AOY66975	transcriptional regulator
	L	AOY67531	DNA helicase II
		AOY67690	exodeoxyribonuclease V subunit gamma
		AOY68305	carboxylesterase
	M	AOY66858	endopeptidase
		AOY68417	hypothetical protein BHE83_18930
	O	AOY65961	Fe-S biogenesis protein NfuA
		AOY67308	dihydroneopterin aldolase
	S	AOY65977	hypothetical protein BHE83_04950
		AOY69232	alpha/beta hydrolase
		AOY69469	hypothetical protein BHE83_23120 (plasmid)
		AOY65213	GNAT family N-acetyltransferase
	T	AOY68428	histidine kinase
		AOY68533	transcriptional regulator
	U	AOY66188	preprotein translocase subunit YajC
		AOY66695	protein TolR
XvDMT1	C	AOY66105	beta-ketoacyl-ACP reductase
		AOY66341	D-glycerate dehydrogenase
		AOY68396	betaine-aldehyde dehydrogenase
		AOY69099	NADH:ubiquinone oxidoreductase subunit J
	D	AOY65638	cell division protein FtsK
		AOY67338	sporulation protein
	E	AOY66838	cysteine synthase A
		AOY66938	acetolactate synthase 2 catalytic subunit
		AOY67073	cystathionine beta-lyase
		AOY67149	D-amino acid dehydrogenase small subunit
		AOY67961	peptidase S9
		AOY65234	methionine synthase
	G	AOY65416	glycoside hydrolase
		AOY66010	lipopolysaccharide assembly protein LapB
		AOY66079	polygalacturonase
		AOY67462	glucose-6-phosphate dehydrogenase
		AOY68122	malto-oligosyltrehalose synthase
	I	AOY65373	2-C-methyl-D-erythritol 2,4-cyclodiphosphate synthase
	J	AOY68590	30S ribosomal protein S12
	L	AOY69083	DNA mismatch repair protein MutL
	M	AOY68446	D-alanine--D-alanine ligase
		AOY68574	hypothetical protein BHE83_19835
	O	AOY66359	peptidase
		AOY68537	peptide-methionine (S)-S-oxide reductase
	P	AOY66827	adenylyl-sulfate kinase
		AOY68183	bacterioferritin
	S	AOY66292	short-chain dehydrogenase
		AOY66544	hypothetical protein BHE83_08200
		AOY67006	hypothetical protein BHE83_10825
		AOY68085	serine kinase
		AOY69160	hypothetical protein BHE83_11730
		AOY69313	hypothetical protein BHE83_21360
	T	AOY66325	phosphodiesterase
		AOY67412	two-component sensor histidine kinase
	U	AOY68098	EscV/YscV/HrcV family type III secretion system export apparatus protein
		AOY68108	EscC/YscC/HrcC family type III secretion system outer membrane ring protein
	V	AOY68169	type I site-specific deoxyribonuclease
XvDMT2	C	AOY65737	Zn-dependent oxidoreductase
		AOY67972	cytochrome C
		AOY68778	aldehyde oxidase
	E	AOY68320	diaminopimelate epimerase
		AOY68467	aminoacyl peptidase
	G	AOY66774	glycogen debranching enzyme GlgX
	H	AOY65654	molybdopterin molybdenumtransferase MoeA
	I	AOY65500	enoyl-CoA hydratase
		AOY67471	3-oxoacyl-ACP reductase
	K	AOY66548	BolA family transcriptional regulator
	K/T	AOY66666	GTP diphosphokinase
	L	AOY67819	Ku protein
	M	AOY66259	undecaprenyl-phosphate glucose phosphotransferase
		AOY67350	hypothetical protein BHE83_12775
		AOY65171	hypothetical protein BHE83_00295
	O	AOY66500	OsmC family peroxiredoxin
	P	AOY67178	Mn-containing catalase
		AOY69102	TonB-dependent receptor
	S	AOY65174	NADPH-dependent FMN reductase
		AOY65221	hypothetical protein BHE83_00585
		AOY65650	hypothetical protein BHE83_03020
		AOY66479	phospholipase
		AOY66552	lipopolysaccharide transport periplasmic protein LptA
		AOY66705	GNAT family N-acetyltransferase
		AOY66715	ABC transporter ATP-binding protein
		AOY66795	hypothetical protein BHE83_09610
		AOY67177	hypothetical protein BHE83_11765
		AOY67691	hemagglutinin
		AOY67754	hypothetical protein BHE83_15065
		AOY68159	hypothetical protein BHE83_17405
		AOY68368	BON domain-containing protein
		AOY68770	NAD(P)-dependent oxidoreductase
		AOY68952	hypothetical protein BHE83_22100
		AOY69041	3-oxoacyl-ACP reductase
		AOY69060	chloroperoxidase
	T	AOY66476	carbon starvation protein A
	V	AOY65223	multidrug ABC transporter ATP-binding protein
		AOY67388	ABC transporter ATP-binding protein
