# Supplementary material for: Two DNA Methyltransferases for Site-Specific 6mA and 5mC DNA Modification in Xanthomonas euvesicatoria
Source: Front Plant Sci. 2021 Mar 24;12:621466. doi: 10.3389/fpls.2021.621466 (PMC8025778; doi:10.3389/fpls.2021.621466)
Supplement: Supplementary file 8 [file Table_8.XLSX]

## Sheet: Supplementary Table 8
Supplementary Table 8. Proteins positively affected by overexpression of XvDMT1 or XvDMT2
	COG group	Accession	gene function
XvDMT1 and XvDMT2	C	AOY65157	ferredoxin--NADP(+) reductase
		AOY65768	3-hydroxybutyrate dehydrogenase
		AOY68053	glycerol-3-phosphate dehydrogenase
	C,H	AOY69285	2-octaprenyl-3-methyl-6-methoxy-1,4-benzoquinol hydroxylase
	E	AOY65305	histidine ammonia-lyase
		AOY65477	histidinol-phosphate transaminase
		AOY66060	acetylglutamate kinase
		AOY67092	cysteine synthase
	F	AOY66083	N-ethylammeline chlorohydrolase
		AOY67335	deoxyuridine 5'-triphosphate nucleotidohydrolase
	H	AOY65428	pantoate--beta-alanine ligase
		AOY66589	pyridoxamine 5'-phosphate oxidase
		AOY66628	adenosylmethionine--8-amino-7-oxononanoate transaminase
	I	AOY66817	carboxylesterase
	J	AOY66301	30S ribosomal protein S15
		AOY67243	peptide deformylase
		AOY68506	16S rRNA (adenine(1518)-N(6)/adenine(1519)-N(6))-dimethyltransferase
	K	AOY66030	ScpBXv
		AOY66449	Fur family transcriptional regulator
	L	AOY65195	DNA repair protein RecN
	M	AOY66950	3-deoxy-D-manno-octulosonic acid transferase
		AOY67057	dTDP-4-dehydrorhamnose 3,5-epimerase
		AOY67545	16S rRNA (guanine(527)-N(7))-methyltransferase
		AOY68348	lytic murein transglycosylase B
		AOY68436	16S rRNA (cytosine(1402)-N(4))-methyltransferase
	O	AOY65156	glutathione peroxidase
		AOY65197	nucleotide exchange factor GrpE
		AOY66521	Fe-S cluster assembly protein SufD
		AOY68322	HslU--HslV peptidase proteolytic subunit
		AOY69470	hypothetical protein BHE83_23125 (plasmid)
	P	AOY65194	transcriptional repressor
	Q	AOY65446	methyltransferase
		AOY67699	outer membrane lipid asymmetry maintenance protein MlaD
	S	AOY65220	hypothetical protein BHE83_00580
		AOY65673	stress-induced protein
		AOY66417	hypothetical protein BHE83_07490
		AOY66478	HAD family hydrolase
		AOY66511	DNA-binding protein
		AOY66691	tol-pal system protein YbgF
		AOY66740	hypothetical protein BHE83_09290
		AOY66744	hypothetical protein BHE83_09310
		AOY66775	histone-like nucleoid-structuring protein
		AOY67637	acid phosphatase
		AOY67668	hypothetical protein BHE83_14580
		AOY67679	hypothetical protein BHE83_14650
		AOY68256	lipase
		AOY68477	methyltransferase
		AOY68663	alkylhydroperoxidase
		AOY68854	hypothetical protein BHE83_21510
		AOY69379	hypothetical protein BHE83_22640 (plasmid)
		AOY69413	hypothetical protein BHE83_22820 (plasmid)
		AOY69508	hypothetical protein BHE83_23270 (plasmid)
	T	AOY65517	two-component system response regulator
		AOY68866	polyvinylalcohol dehydrogenase
	U	AOY67012	type II secretion system protein GspD
	V	AOY65207	ABC transporter ATP-binding protein
		AOY65805	lipoprotein releasing system, ATP-binding protein
XvDMT1	C	AOY67956	malate synthase A
		AOY68548	nitroreductase
	E	AOY66057	argininosuccinate lyase
		AOY68940	leucine dehydrogenase
	F	AOY68779	FAD-binding molybdopterin dehydrogenase
	G	AOY65792	6-phosphogluconolactonase
		AOY66955	alpha-1 2-mannosidase
		AOY67856	hypothetical protein BHE83_15675
	G	AOY68391	glucose/galactose MFS transporter
	H	AOY65427	3-methyl-2-oxobutanoate hydroxymethyltransferase
		AOY68513	2-octaprenyl-6-methoxyphenyl hydroxylase
		AOY65200	pyridoxal kinase
	I	AOY68843	4-hydroxy-3-methylbut-2-enyl diphosphate reductase
	J	AOY66350	ribosomal protein S12 methylthiotransferase
		AOY66450	glutamate--tRNA ligase
		AOY66555	ribosomal subunit interface protein
		AOY68888	ribosome maturation factor RimM
		AOY68957	hypothetical protein BHE83_22125
		AOY68959	hypothetical protein BHE83_22135
	K	AOY65413	galactose-binding protein
		AOY66703	transcriptional regulator
	L	AOY65209	Rossman fold protein, TIGR00730 family
		AOY68191	NADH pyrophosphatase
		AOY69336	replicative DNA helicase (plasmid)
	M	AOY66857	peptidoglycan-binding protein
		AOY67234	GNAT family N-acetyltransferase
		AOY67661	peptidoglycan-binding protein
	O	AOY66293	monothiol glutaredoxin, Grx4 family
	P	AOY67128	methionine ABC transporter substrate-binding protein
	S	AOY65287	hypothetical protein BHE83_00960
		AOY65733	hypothetical protein BHE83_03520
		AOY66016	hypothetical protein BHE83_05165
		AOY66306	ribosome maturation factor RimP
		AOY66324	hypothetical protein BHE83_06955
		AOY67041	hypothetical protein BHE83_11025
		AOY67097	hypothetical protein BHE83_11315
		AOY67439	cysteine protease
		AOY67483	pteridine-dependent deoxygenase
		AOY67701	anti-sigma B factor antagonist
		AOY67755	aminopeptidase
		AOY67914	hypothetical protein BHE83_16015
		AOY68029	FMN reductase
		AOY68242	malonate decarboxylase subunit alpha
		AOY68523	hypothetical protein BHE83_19545
		AOY68685	hypothetical protein BHE83_20480
		AOY68974	hypothetical protein BHE83_22215
		AOY69080	glutaryl-7-ACA acylase
		AOY69308	hypothetical protein BHE83_21150
		AOY69526	KfrA protein (plasmid)
		AOY69533	MobD protein (plasmid)
		AOY69563	putative toxin-antitoxin system toxin component, PIN family (plasmid)
	T	AOY65437	two-component system response regulator
		AOY67267	histidine kinase
	U	AOY67899	protein-export chaperone SecB
	V	AOY65731	XvDMT1
		AOY66414	serine hydrolase
XvDMT2	C	AOY68457	NAD(P)H-quinone oxidoreductase
	C,K	AOY67456	GNAT family N-acetyltransferase
	E	AOY65317	3-phosphoshikimate 1-carboxyvinyltransferase
		AOY65469	bifunctional aspartate kinase/homoserine dehydrogenase I
		AOY65475	ATP phosphoribosyltransferase
		AOY65478	bifunctional imidazole glycerol-phosphate dehydratase/histidinol phosphatase
		AOY65507	4-hydroxy-tetrahydrodipicolinate reductase
		AOY66331	tryptophan synthase subunit alpha
		AOY67108	chorismate mutase
		AOY68031	5-methyltetrahydropteroyltriglutamate--homocysteine methyltransferase
		AOY68071	serine dehydratase
		AOY68495	hypothetical protein BHE83_19385
		AOY68751	aminopeptidase
	F	AOY66002	glutamine-hydrolyzing GMP synthase
		AOY66142	rRNA maturation RNase YbeY
		AOY68020	formyltetrahydrofolate deformylase
	G	AOY65420	MFS transporter
		AOY66164	MFS transporter
		AOY67462	glucose-6-phosphate dehydrogenase
		AOY67463	glycosyl hydrolase
		AOY68122	malto-oligosyltrehalose synthase
		AOY68733	methylisocitrate lyase
		AOY69250	ribulose-phosphate 3-epimerase
	H	AOY65384	dihydropteroate synthase
		AOY65401	bifunctional hydroxymethylpyrimidine kinase/phosphomethylpyrimidine kinase
		AOY65668	siroheme synthase
		AOY66592	uroporphyrinogen decarboxylase
		AOY68419	3,4-dihydroxy-2-butanone-4-phosphate synthase
	I	AOY69000	di-trans,poly-cis-decaprenylcistransferase
	J	AOY66337	tRNA pseudouridine(38-40) synthase TruA
		AOY66818	RNA methyltransferase
		AOY67139	16S rRNA pseudouridine(516) synthase
		AOY67304	30S ribosomal protein S21
		AOY68608	30S ribosomal protein S14
		AOY68611	50S ribosomal protein L18
	K	AOY67965	AcrR family transcriptional regulator
		AOY68211	transcriptional regulator
		AOY68967	hypothetical protein BHE83_22175
	L	AOY65632	NUDIX hydrolase
		AOY65832	DNA methyltransferase
		AOY65938	XvDMT2
		AOY66676	ATP-dependent RNA helicase HrpA
		AOY67988	ATP-dependent helicase HrpB
		AOY68045	gamma carbonic anhydrase family protein
	M	AOY65227	UDP-glucose 6-dehydrogenase
		AOY65810	tetraacyldisaccharide 4'-kinase
		AOY65811	3-deoxy-manno-octulosonate cytidylyltransferase
		AOY67072	glycosyl transferase family 1
		AOY67566	fuconate dehydratase
		AOY69166	CDP-glycerol glycerophosphotransferase
	O	AOY66359	peptidase
		AOY66520	Fe-S cluster assembly ATPase SufC
		AOY68773	thioredoxin reductase
	P	AOY65162	carbonic anhydrase
		AOY66631	TonB-dependent receptor
		AOY66828	sulfate adenylyltransferase small subunit
		AOY66900	Oar protein
		AOY68622	TonB-dependent receptor
	Q	AOY67565	2-hydroxyhepta-2,4-diene-1,7-dioate isomerase
		AOY69227	peptide synthase
	S	AOY65263	hypothetical protein BHE83_00810
		AOY65279	N-acetylmuramidase
		AOY65403	hypothetical protein BHE83_01645
		AOY65406	hypothetical protein BHE83_01660
		AOY65563	hypothetical protein BHE83_02555
		AOY65651	hypothetical protein BHE83_03025
		AOY65723	hypothetical protein BHE83_03465
		AOY65750	hypothetical protein BHE83_03620
		AOY66005	deoxycytidine triphosphate deaminase
		AOY66143	hypothetical protein BHE83_05885
		AOY66321	dehydrogenase
		AOY66563	phospholipase
		AOY66640	type III secretion system effector protein
		AOY66662	hypothetical protein BHE83_08860
		AOY66689	7-cyano-7-deazaguanine synthase QueC
		AOY66801	histone-like nucleoid-structuring protein
		AOY66822	hypothetical protein BHE83_09795
		AOY67564	NAD(P)-dependent oxidoreductase
		AOY67671	enterochelin esterase
		AOY67800	AAA family ATPase
		AOY67802	peptidase C69
		AOY67803	TldD protein
		AOY67902	hypothetical protein BHE83_15955
		AOY67911	hypothetical protein BHE83_16000
		AOY67941	sterol-binding protein
		AOY68030	hypothetical protein BHE83_16655
		AOY68103	type III secretion protein HrpB4
		AOY68274	oxidoreductase
		AOY68635	hypothetical protein BHE83_20175
		AOY68832	hypothetical protein BHE83_21385
		AOY69112	23S rRNA (adenine(2030)-N(6))-methyltransferase RlmJ
		AOY69402	hypothetical protein BHE83_22760 (plasmid)
		AOY65138	hypothetical protein BHE83_00105
	T	AOY65329	hybrid sensor histidine kinase/response regulator
		AOY65386	RNA chaperone Hfq
		AOY65626	DNA-binding protein
		AOY65777	histidine kinase
		AOY66835	histidine kinase
		AOY68066	kinase
		AOY68254	IcfG protein
		AOY68370	two-component system response regulator
		AOY68660	phosphate regulon transcriptional regulatory protein PhoB
		AOY68871	hybrid sensor histidine kinase/response regulator
	U	AOY67021	type II secretion system protein GspF
		AOY67584	type II secretion system protein E
		AOY69512	TrwB protein (plasmid)
		AOY69536	type VI secretion protein (plasmid)
	V	AOY65865	aminoglycoside O-phosphotransferase APH(6)-Id
		AOY68760	DNA methyltransferase
