# Supplementary material for: Two DNA Methyltransferases for Site-Specific 6mA and 5mC DNA Modification in Xanthomonas euvesicatoria
Source: Front Plant Sci. 2021 Mar 24;12:621466. doi: 10.3389/fpls.2021.621466 (PMC8025778; doi:10.3389/fpls.2021.621466)
Supplement: Supplementary file 9 [file Table_9.XLSX]

## Sheet: Sheet1
Supplementary Table 9. Methylation motifs in Xe, ER3413(EV), ER3413(XvDMT1), and ER3413(XvDMT2) identified by SMRT sequencing.
methylome	No. of motifs detected in Xe (methylated/total)	% of methylated motifs detected in Xe	No. of motifs detected in ER3413(XvDMT1) (methylated/total)	% of methylated motifs detected in ER3413(XvDMT1)	No. of motifs detected in ER3413(XvDMT2) (methylated/total)	% of methylated motifs detected in ER3413(XvDMT2)	No. of motifs detected in ER3413(EV) (methylated/total)	% of methylated motifs detected in ER3413(EV)
RG_A_CNNNNNGGT	1127/1127	100	0/569	0	0/570	0	0/572	0
A_A_GNNNNNNCTC	1155/1156	99.9135	1/1130	0.0884956	2/1124	0.177936	3/1132	0.265018
_A_CCNNNNNGTCY	1126/1127	99.9113	0/569	0	1/570	0.175439	0/572	0
TACG_A_G	982/983	99.8983	161/591	27.242	4/587	0.681431	7/591	1.18443
G_A_GNNNNNNCTT	1151/1156	99.5675	6/1130	0.530973	3/1124	0.266904	10/1132	0.883392
C_C_CGGG	2707/2722	99.4489	18/844	2.1327	40/840	4.7619	33/840	3.92857
CTAMR_A_G	407/984	41.3618	53/666	7.95796	1/660	0.151515	2/663	0.301659
_C_VNGGACNNNNNGGT	59/264	22.3485	2/61	3.27869	2/61	3.27869	0/60	0
ACG_A_G	1044/6664	15.6663	183/3884	4.71164	27/3851	0.701117	46/3888	1.18313
C_C_SGG	2828/33966	8.32597	959/17982	5.33311	1320/17884	7.3809	1513/18056	8.37949
CGAAG_A_C	53/1571	3.37365	0/420	0	0/414	0	0/419	0
C_C_CNNNNNRTTGY	17/610	2.78689	12/466	2.57511	15/463	3.23974	14/467	2.99786
_C_CGG	2796/106258	2.63133	2657/48578	5.46955	3784/48382	7.82109	3691/48806	7.56259
GAGG_A_C	38/1476	2.57453	0/463	0	0/455	0	0/455	0
G_A_GTC	73/3093	2.36017	38/3672	1.03486	40/3655	1.09439	62/3690	1.68022
G_A_GG	606/26796	2.26153	301/16183	1.85998	307/16054	1.9123	411/16164	2.54269
G_A_GNNNNNNNTRRG	23/1138	2.02109	7/736	0.951087	8/733	1.09141	11/742	1.48248
CGCRG_A_C	51/2557	1.99452	1/1100	0.0909091	0/1087	0	1/1100	0.0909091
GGG_A_C	83/4334	1.91509	1/2699	0.0370508	2/2685	0.0744879	0/2724	0
GAG_A_CC	32/1685	1.89911	1/260	0.384615	0/258	0	0/257	0
CTTA_A_G	3/166	1.80723	2/1100	0.181818	4/1096	0.364964	4/1100	0.363636
CTTG_A_G	51/2884	1.76838	6/1027	0.584226	5/1013	0.493583	12/1015	1.18227
GG_A_GGC	41/2325	1.76344	43/981	4.38328	49/971	5.04634	49/977	5.01535
ACG_A_BGG	46/2630	1.74905	11/1310	0.839695	7/1299	0.538876	7/1304	0.53681
G_A_GNNNNNCTTC	12/687	1.74672	1/450	0.222222	0/443	0	0/448	0
CTGA_A_G	39/2266	1.72109	5/2879	0.173671	7/2876	0.243394	4/2885	0.138648
CAG_A_G	68/4123	1.64928	35/6981	0.501361	34/6951	0.489138	46/6995	0.657613
AG_A_CC	155/9438	1.6423	8/4967	0.161063	6/4946	0.12131	9/4994	0.180216
CTYR_A_G	112/6828	1.6403	10/3512	0.284738	11/3476	0.316456	17/3482	0.488225
G_A_GNNNNNNRTAYG	3/186	1.6129	5/230	2.17391	3/230	1.30435	7/231	3.0303
CCCA_A_G	36/2257	1.59504	0/443	0	0/432	0	0/427	0
TG_A_G	373/23744	1.57092	213/24135	0.882536	206/23993	0.858584	390/24154	1.61464
CTCG_A_G	14/894	1.566	1/358	0.27933	1/354	0.282486	0/352	0
GAG_A_C	64/4100	1.56098	2/3016	0.066313	1/2994	0.0334001	2/3002	0.0666223
GRTTR_A_G	20/1286	1.55521	13/2153	0.603809	16/2137	0.748713	24/2151	1.11576
ACCA_A_G	37/2440	1.51639	0/775	0	2/751	0.266312	1/749	0.133511
CRRTA_A_G	9/612	1.47059	10/2200	0.454545	7/2193	0.319197	14/2212	0.632911
CTGR_A_G	86/5887	1.46085	17/5586	0.304332	19/5575	0.340807	22/5604	0.392577
GCA_A_GG	95/6619	1.43526	15/2077	0.722195	20/2048	0.976562	19/2050	0.926829
GGCG_A_G	87/6139	1.41717	17/2698	0.630096	16/2674	0.598355	16/2682	0.59657
CACG_A_GH	13/930	1.39785	1/673	0.148588	0/669	0	0/676	0
CACG_A_G	18/1300	1.38462	3/841	0.356718	1/832	0.120192	3/840	0.357143
TCG_A_G	148/10827	1.36695	28/4853	0.576963	22/4820	0.456432	55/4842	1.13589
CTAA_A_G	3/220	1.36364	1/1240	0.0806452	1/1234	0.0810373	2/1245	0.160643
RTCG_A_G	101/7452	1.35534	19/3410	0.557185	16/3386	0.472534	45/3410	1.31965
GCGG_A_G	25/1856	1.34698	8/1543	0.518471	9/1525	0.590164	13/1527	0.851343
G_A_GNNNNNGT	66/4951	1.33306	2/4439	0.0450552	2/4417	0.0452796	1/4458	0.0224316
CTRG_A_G	51/3834	1.3302	12/2776	0.432277	12/2766	0.433839	18/2785	0.64632
AAA_A_GRG	4/305	1.31148	3/1343	0.22338	4/1337	0.299177	8/1344	0.595238
CTGG_A_G	47/3621	1.29798	12/2707	0.443295	12/2699	0.444609	18/2719	0.662008
AAGG_A_G	12/960	1.25	16/1135	1.40969	18/1125	1.6	21/1137	1.84697
ACRG_A_G	15/1210	1.23967	14/2064	0.678295	11/2051	0.536324	20/2070	0.966184
GAG_A_CG	17/1395	1.21864	0/1124	0	0/1118	0	2/1120	0.178571
GAAG_A_GC	8/657	1.21766	1/676	0.147929	0/674	0	1/682	0.146628
GATCG_A_G	22/1823	1.2068	1/409	0.244499	0/405	0	2/407	0.4914
CCCG_A_G	27/2247	1.2016	4/651	0.614439	3/637	0.470958	5/636	0.786164
CGGNA_A_G	61/5115	1.19257	2/3087	0.0647878	3/3073	0.0976245	6/3081	0.194742
GCVG_A_G	141/11882	1.18667	22/5813	0.378462	30/5768	0.520111	39/5785	0.674157
GCYA_A_G	76/6536	1.16279	3/1887	0.158983	3/1847	0.162426	1/1858	0.0538213
TANA_A_G	24/2109	1.13798	9/4764	0.188917	7/4760	0.147059	17/4788	0.355054
GGCGG_A_G	7/616	1.13636	5/546	0.915751	3/541	0.554529	5/544	0.919118
GAAG_A_G	19/1695	1.12094	11/2954	0.372376	16/2949	0.542557	19/2971	0.639515
CAGA_A_G	22/1963	1.12073	5/2591	0.192976	6/2580	0.232558	4/2596	0.154083
CCRG_A_G	45/4109	1.09516	19/4484	0.423729	19/4455	0.426487	29/4473	0.648334
CCAA_A_G	12/1110	1.08108	1/2308	0.0433276	5/2295	0.217865	5/2313	0.216169
GCCR_A_G	154/14247	1.08093	6/3065	0.195759	11/3007	0.365813	10/3019	0.331236
GTA_A_G	20/1866	1.07181	21/5349	0.392597	23/5314	0.432819	31/5352	0.579223
GACG_A_G	28/2616	1.07034	5/1192	0.419463	10/1181	0.84674	13/1191	1.09152
ACGR_A_G	43/4058	1.05964	11/2954	0.372376	12/2930	0.409556	18/2946	0.610998
GAA_A_G	56/5301	1.0564	9/11972	0.0751754	14/11933	0.117322	16/12007	0.133256
TAGG_A_G	4/379	1.05541	1/247	0.404858	1/245	0.408163	1/248	0.403226
BN_A_KGYAVYA	19/1805	1.05263	493/2091	23.5772	627/2083	30.1008	493/2089	23.5998
CGR_A_GGC	39/3746	1.04111	17/1039	1.63619	23/1015	2.26601	22/1014	2.16963
GCCG_A_G	83/8066	1.02901	5/2059	0.242836	10/2038	0.490677	10/2044	0.489237
GA_A_GT	86/8418	1.02162	14/8798	0.159127	11/8755	0.125642	15/8813	0.170203
